1 **The influence of image masking on object representations during rapid serial visual presentation**

2

3 Amanda K. Robinson<sup>\*a,b,c</sup>, Tijl Grootswagers<sup>\*a,b,c</sup>, Thomas A. Carlson<sup>a,b</sup>

4 \*equal contribution

5

6 <sup>a</sup> School of Psychology, University of Sydney, NSW, 2006, Australia

7 <sup>b</sup> ARC Centre of Excellence in Cognition and Its Disorders, NSW, 2109, Australia

8 <sup>c</sup> Department of Cognitive Science, Macquarie University, NSW, 2109, Australia

9

10 **Abstract**

11 Rapid image presentations combined with time-resolved multivariate analysis methods of EEG or MEG  
12 (rapid-MVPA) offer unique potential in assessing the temporal limitations of the human visual system.  
13 Recent work has shown that multiple visual objects presented sequentially can be simultaneously  
14 decoded from M/EEG recordings. Interestingly, object representations reached higher stages of  
15 processing for slower image presentation rates compared to fast rates. This fast rate attenuation is  
16 probably caused by forward and backward masking from the other images in the stream. Two factors  
17 that are likely to influence masking during rapid streams are stimulus duration and stimulus onset  
18 asynchrony (SOA). Here, we disentangle these effects by studying the emerging neural representation of  
19 visual objects using rapid-MVPA while independently manipulating stimulus duration and SOA. Our  
20 results show that longer SOAs enhance the decodability of neural representations, regardless of  
21 stimulus presentation duration, suggesting that subsequent images act as effective backward masks. In  
22 contrast, image duration does not appear to have a graded influence on object representations.  
23 Interestingly, however, decodability was improved when there was a gap between subsequent images,  
24 indicating that an abrupt onset or offset of an image enhances its representation. Our study yields  
25 insight into the dynamics of object processing in rapid streams, paving the way for future work using this  
26 promising approach.

27

## 28 **Introduction**

29 The human brain processes rapidly changing visual input and can effortlessly extract abstract meaning  
30 when stimuli are presented in rapid sequences (Mack, Gauthier, Sadr, & Palmeri, 2008; Mack & Palmeri,  
31 2011; Potter, Wyble, Haggmann, & McCourt, 2014; Thorpe, Fize, & Marlot, 1996; VanRullen & Thorpe,  
32 2001). Recently, the temporal dynamics of the emerging representation of visual objects have been  
33 studied using fast presentation rates and multivariate analysis methods of electroencephalography  
34 (EEG) and magnetoencephalography (MEG) (Grootswagers, Robinson, & Carlson, 2019; Marti &  
35 Dehaene, 2017; Mohsenzadeh, Qin, Cichy, & Pantazis, 2018). Notably, multiple visual objects  
36 represented in different stages of the visual system can be decoded from the EEG signal at the same  
37 time (Grootswagers et al., 2019). Object representations persisted for longer when presented at slower  
38 presentation rates compared to faster rates (Grootswagers et al., 2019; Mohsenzadeh et al., 2018).  
39 Additionally, images presented at slower rates reached higher stages of processing, such that categorical  
40 abstraction of animacy was evident for images in 5Hz but not 20Hz RSVP sequences (Grootswagers et  
41 al., 2019). The extended neural representations for slower versus faster presentation rates could be  
42 ascribed to the longer stimulus duration, or the longer stimulus onset asynchrony (SOA) of images in  
43 slower sequences.

44

45 Limitations in visual processing during rapid serial visual presentation (RSVP) is likely due to interference  
46 from processing multiple images in short succession. Decades of cognitive research have documented  
47 limitations in reporting targets during RSVP in phenomena such as the attentional blink (Broadbent &  
48 Broadbent, 1987; Raymond, Shapiro, & Arnell, 1992) and repetition blindness (Kanwisher, 1987). Such  
49 effects are typically studied to investigate high-level cognitive limitations rather than low-level visual  
50 processing interference (Raymond et al., 1992; Sergent, Baillet, & Dehaene, 2005). It is important to  
51 note, however, that target masking has a large effect on target detection during RSVP; for example,  
52 during the attentional blink, masking of the first target attenuates reporting of the second target

53 (Seiffert & Di Lollo, 1997) and masking of the second target is necessary to elicit the attentional blink  
54 (Giesbrecht & Di Lollo, 1998). These findings suggest an important effect of low-level visual masking on  
55 higher-level processing during RSVP. In fast sequences, images are likely subject to forward masking by  
56 the previous image and backward masking by the next image in the sequence. Changing the image  
57 presentation rates has the effect of altering the timing of the masks. Backward and forward masking  
58 seem to have dissociable effects on perception, with one study showing maximal forward masking for  
59 0ms gap between stimuli, and maximal backward masking at 30-90ms gap (Bachmann & Allik, 1976).  
60 EEG has shown that backward pattern masking influences processing after approximately 180ms,  
61 consistent with recurrent processing rather than feedforward processing deficits (Fahrenfort, Scholte, &  
62 Lamme, 2007). Understanding how masking affects the temporal dynamics of image processing during  
63 rapid-MVPA can yield important insights about the temporal limitations of the human visual system.

64

65 Studies of periodic visual evoked potentials also provide insights into the effect of image presentation  
66 rate on the extent of visual object processing. Faces presented at slower frequencies reach further  
67 stages of processing than those at faster rates, such that 15Hz presentations seemed limited to early  
68 visual processes, 6Hz showed increased occipitotemporal responses, and 3.75Hz included higher level  
69 cognitive effects and frontal responses (Collins, Robinson, & Behrmann, 2018). Retter et al., (2018)  
70 showed that SOA and image duration had dissociable effects on the periodic response. Images at 10Hz  
71 had larger evoked responses than those at 20Hz, but a 50% on-off image duty cycle (50ms duration,  
72 100ms SOA) resulted in larger responses than 100% duty cycle with same SOA (100ms duration, 100ms  
73 SOA), a finding attributed to forward masking in the 100% duty cycle condition (Retter, Jiang, Webster,  
74 & Rossion, 2018). Taken together, it seems likely that SOA and image duration have separable influences  
75 on visual responses, but how these differentially influence the temporal dynamics of individual image  
76 processing remains to be seen.

77

78 Here, we investigate the effect of image masking on the temporal dynamics of image processing by  
79 studying the emerging neural representation of visual objects in fast visual streams while separately  
80 manipulating stimulus duration and SOA. These factors could be predicted to influence the temporal  
81 dynamics of individual image processing in a linear or non-linear fashion. Varying SOA, and thus the  
82 amount of time an image can be processed before another image (acting as a mask) appears, could  
83 linearly influence the duration of image processing if the length of processing is directly related to the  
84 amount of time dedicated to processing the uninterrupted images. Alternatively, there might be a limit  
85 on the number of items that can be held in the visual system at once. If SOA influences the dynamics of  
86 image processing depending on the stage of processing that is influenced by forward and backward  
87 masking, this would predict a non-linear increase in image processing. Our results show that a longer  
88 SOA enhances the decodability of the neural representations in a non-linear fashion, regardless of  
89 stimulus presentation duration. Our results also suggest that presenting stimuli with no gap between  
90 subsequent images (100% duty cycle) delays the processing of each image.

91

## 92 **Methods**

93 Stimuli, data, and code are available at: <https://doi.org/10.17605/OSF.IO/3RMJ9>.

94

## 95 **Stimuli**

96 We collected a stimulus set of 24 visual objects spanning 6 categories (Figure 1A). Stimuli were obtained  
97 from the free image hosting website [www.pngimg.com](http://www.pngimg.com). The top-level categories were animals and  
98 vehicles subdivided into 3 subcategories: birds, dogs, fish, boats, cars, and planes. Each of the  
99 subcategories consisted of 4 images each. These images allowed us to investigate visual representations  
100 for three different categorical levels: the animal/vehicle distinction (2 categories), object category (6  
101 categories, e.g., boats, birds) and image-level (24 images, e.g., yacht, duck). Images were presented

102 using Psychtoolbox (Brainard, 1997; Kleiner et al., 2007; Pelli, 1997) in Matlab. Images were each shown  
103 foveally within a square at approximately 3 x 3 degrees of visual angle.

104

### 105 **Participants and experimental procedure**

106 Participants were 20 adults recruited from the University of Sydney (12 female, 8 male; mean age:  
107 25.75, age range 18-52 years) in return for payment or course credit. The study was approved by the  
108 University of Sydney ethics committee and informed consent was obtained from all participants.  
109 Participants viewed 200 sequences of objects. Each sequence consisted of the 24 stimuli in a random  
110 order. To ensure all images were equally masked by other images, the sequences were padded with 12  
111 stimuli on both ends, which were excluded from the decoding analysis. The 12 padding stimuli consisted  
112 of the same sequence in reverse order, with mirrored versions of the images. Essentially, this meant  
113 that each of the 24 experimental images was presented twice per sequence. To keep participants  
114 engaged, at the end of each sequence, after a 1000ms blank screen, a random image from the stimulus  
115 set was presented for 100ms and participants categorised this stimulus as animal or vehicle using a left  
116 or right button press (response mappings were alternated between participants). The presentation rates  
117 of the sequences were chosen from one of five conditions, which were randomized throughout the  
118 study (40 sequences per condition). In conditions 1-3, the presentation duration varied (200ms, 100ms,  
119 and 50ms) while keeping the SOA at 200ms. In conditions 3-5, the SOA varied (200ms, 100ms, and  
120 50ms) while keeping the presentation duration at 50ms (Figure 1B). This set-up allowed us to use  
121 condition 3 as anchor point to compare the effects between varying SOA and duration. In total,  
122 participants viewed 9600 presentations, consisting of 80 presentations for each of the 24 images and for  
123 the 5 duration/SOA conditions.

124

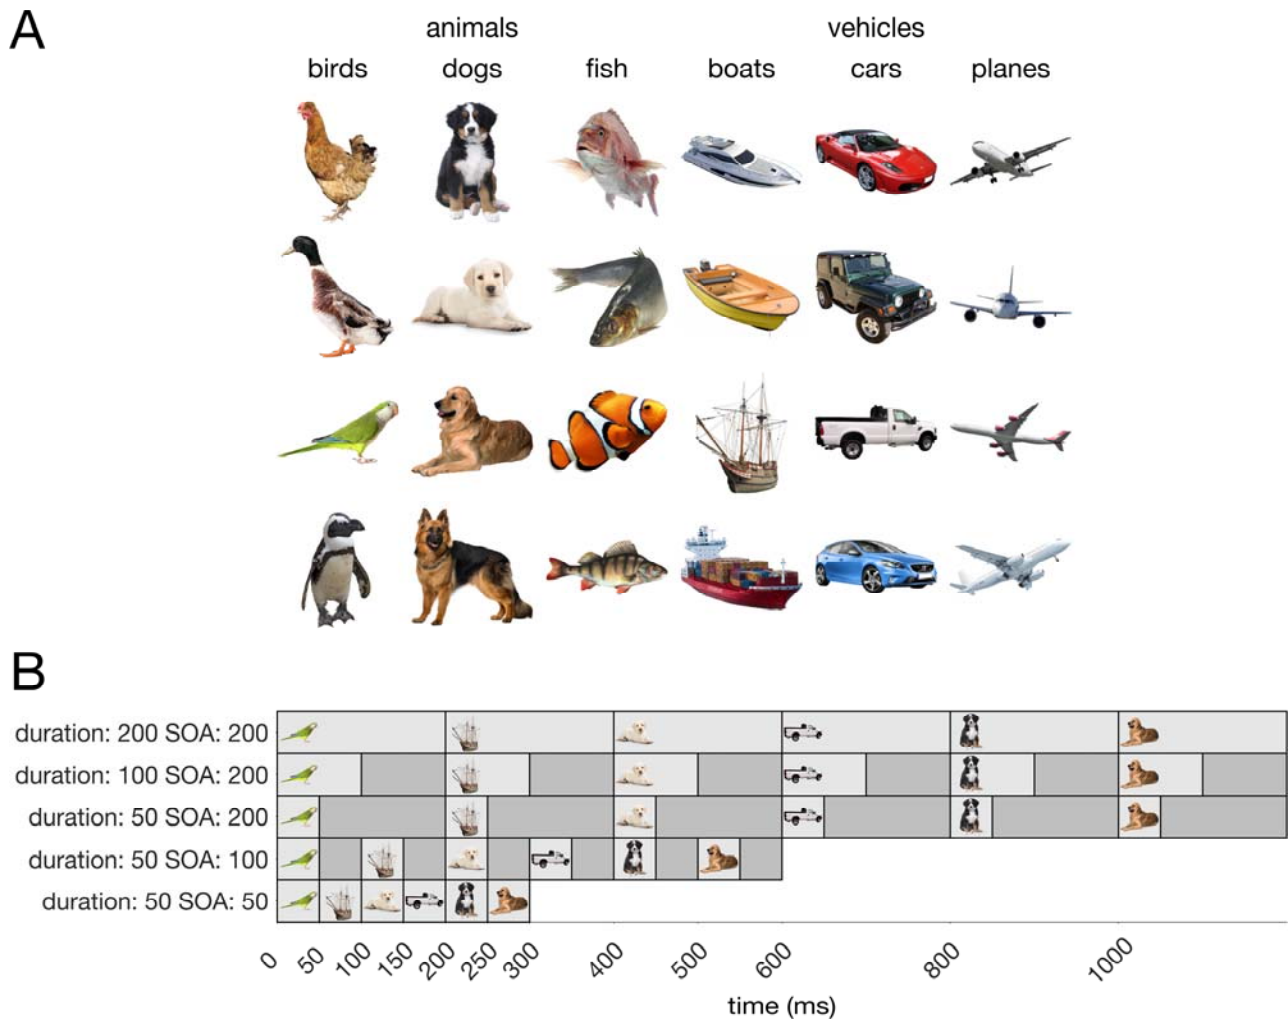

125

126 Figure 1. Stimuli and design. A) Experimental stimuli consisted of 24 images of objects organised at three  
 127 different levels: animal versus vehicle, object category (6 categories e.g., birds, boats) and image (e.g.,  
 128 duck, chicken). B) Example time-lines illustrating the timing of the first six stimuli in a sequence in the  
 129 different conditions. Images were presented in sequences with image durations of 200ms, 100ms and  
 130 50ms, and SOA of 200ms, 100ms and 50ms (5 conditions).

131

### 132 EEG recordings and preprocessing

133 EEG data were continuously recorded from 64 electrodes (arranged in the international 10–10 system  
 134 (Oostenveld & Praamstra, 2001)) using a BrainVision ActiChamp system, digitized at a 1000-Hz sample  
 135 rate. Scalp electrodes were referenced to Cz during recording. EEGLab (Delorme & Makeig, 2004) was  
 136 used to pre-process the data offline, where data were filtered using a Hamming windowed sinc FIR filter  
 137 with highpass of 0.1Hz and lowpass of 100Hz. Data were then downsampled to 250Hz and epochs were

138 created for each stimulus presentation ranging from [-100 to 1000ms] relative to stimulus onset. No  
139 further preprocessing steps were applied.

140

#### 141 **Decoding analysis**

142 An MVPA time-series decoding pipeline (Grootswagers, Wardle, & Carlson, 2017; Oosterhof, Connolly, &  
143 Haxby, 2016) was applied to each stimulus presentation epoch in the sequence to investigate object  
144 representations in fast sequences. Linear discriminant analysis classifiers were trained using an image by  
145 sequence cross-validation procedure (Grootswagers et al., 2019) to distinguish between all pairwise  
146 groupings within the categorical levels (category, object). This entailed holding out one image from each  
147 category in one sequence as test data and training the classifier on the remaining images from the  
148 remaining sequences. For pairwise decoding of the non-categorical image-level, we used a leave-one-  
149 sequence-out cross-validation procedure. The decoding analyses were performed separately for the five  
150 duration/SOA conditions. For each condition, this resulted in three decoding accuracies over time (for  
151 animacy, category, and image). At each time point, these accuracies were compared against chance  
152 (50%), and compared to each other. All steps in the decoding analysis were implemented in  
153 CoSMoMVPA (Oosterhof et al., 2016).

154

#### 155 **Statistical inference**

156 We used Bayes factors (Dienes, 2011; Jeffreys, 1998; Kass & Raftery, 1995; Rouder, Speckman, Sun,  
157 Morey, & Iverson, 2009; Wagenmakers, 2007) to determine the evidence for the null and alternative  
158 hypotheses. For the alternative hypothesis of above-chance decoding, a uniform prior was used ranging  
159 from the maximum value observed during the baseline (before stimulus onset) up to 1 (i.e., 100%  
160 decoding). For testing the hypothesis of a difference between decoding accuracies, a uniform prior was  
161 set ranging from the maximum absolute difference between decoding accuracies observed during the  
162 baseline up to 0.5 (50%). We then calculated the Bayes factor (BF), which is the probability of the data



163 under the alternative hypothesis relative to the null hypothesis. We thresholded  $BF > 6$  as strong  
164 evidence for the alternative hypothesis, and  $BF < 1/6$  as strong evidence in favour of the null hypothesis  
165 (Jeffreys, 1998; Kass & Raftery, 1995; Wetzels et al., 2011). BF that lie between those values indicate  
166 insufficient evidence for either hypothesis.

167

168 To determine onset, offset, and peak time signatures, we defined onset as the second time point where  
169 the Bayes factor exceeded 6 and offset as the second-to-last time point where the Bayes factor  
170 exceeded 6. Peak decoding time was defined as the latency at which the maximum decoding accuracy  
171 was observed in the entire time window. We calculated bootstrap distributions of these latency  
172 measures by sampling from the participants with replacement 1000 times and recomputing the  
173 abovementioned statistics.

174

## 175 **Results**

176 We examined the temporal dynamics of object processing using rapid-MVPA with sequences of varying  
177 image duration and SOA. During the experiment, participants reported whether an image presented  
178 after each sequence was an animal or a vehicle. Behavioural performance was high for discrimination of  
179 animal ( $M = 97.10\%$ ,  $SD = 5.23\%$ ) and vehicle ( $M = 98.10\%$ ,  $SD = 3.01\%$ ) stimuli.

180

181 To investigate the temporal dynamics of object processing, we decoded the objects at three levels of  
182 categorical abstraction: animacy-level (animate versus inanimate), category-level (birds, dogs, fish,  
183 boats, planes, cars), and image-level (24 images; 4 per category). The decoding analyses were  
184 performed separately for each SOA and image duration condition. Figure 2 shows the temporal  
185 dynamics of all categorical representations varied by SOA and image duration. For the effect of duration  
186 (left columns), all durations followed a similar decoding trajectory, but classification was poorer in  
187 general for the longest duration, which also happened to be the 100% duty-cycle condition (200ms SOA,

188 200ms duration). For animacy and category decoding, the first peak (~100ms) was similar across the  
189 conditions, but the 200ms duration was lower than both the 50ms and 100ms conditions from 150-  
190 200ms, suggesting poorer categorical abstraction for this condition. Additionally, for the individual  
191 image decoding analysis, the onset of decoding appeared to be delayed for the 200ms duration relative  
192 to the 50ms and 100ms durations.

193

194 The right columns of Figure 2 show that for a given image duration (50ms), increasing SOA led to greater  
195 neural decoding for all categorical levels. For animacy and category decoding, the initial peak (~120ms)  
196 did not differ by SOA, but the larger second peak (~200ms) showed graded responses depending on  
197 SOA. At this peak, there was a small but reliable increase in decoding for the 200ms SOA relative to the  
198 100ms, and these were both substantially higher than the 50ms SOA. Again, for the image decoding the  
199 100% duty-cycle condition (50ms SOA/50ms duration) appeared delayed and had poorer decoding  
200 relative to the other conditions. Furthermore, the 200ms SOA had greater decoding than the 100ms  
201 SOA condition between 100 and 200ms. Overall, these results imply that longer SOA led to stronger  
202 image representations.

203

204 To further assess the effect of image duration and SOA on object decoding, we analysed the timing of  
205 the decoding window (onset to offset of above-chance decoding) and the latency of peak decoding.  
206 Figure 3 shows that the medium duration condition (duration 100/SOA 200) had the longest decoding  
207 window for all decoding contrasts. In contrast, the shortest duration and SOA condition (duration  
208 50/SOA 50) had delayed onsets and the shortest decoding window. The peak latency results revealed  
209 that for animacy and category, the 100% duty-cycle conditions (200/200 and 50/50) had the latest  
210 peaks. For the image decoding, however, the 200/200 condition had the latest peak, whereas the 50/50  
211 condition had a much earlier peak, suggesting that ongoing processing in the latter condition was  
212 limited.

213

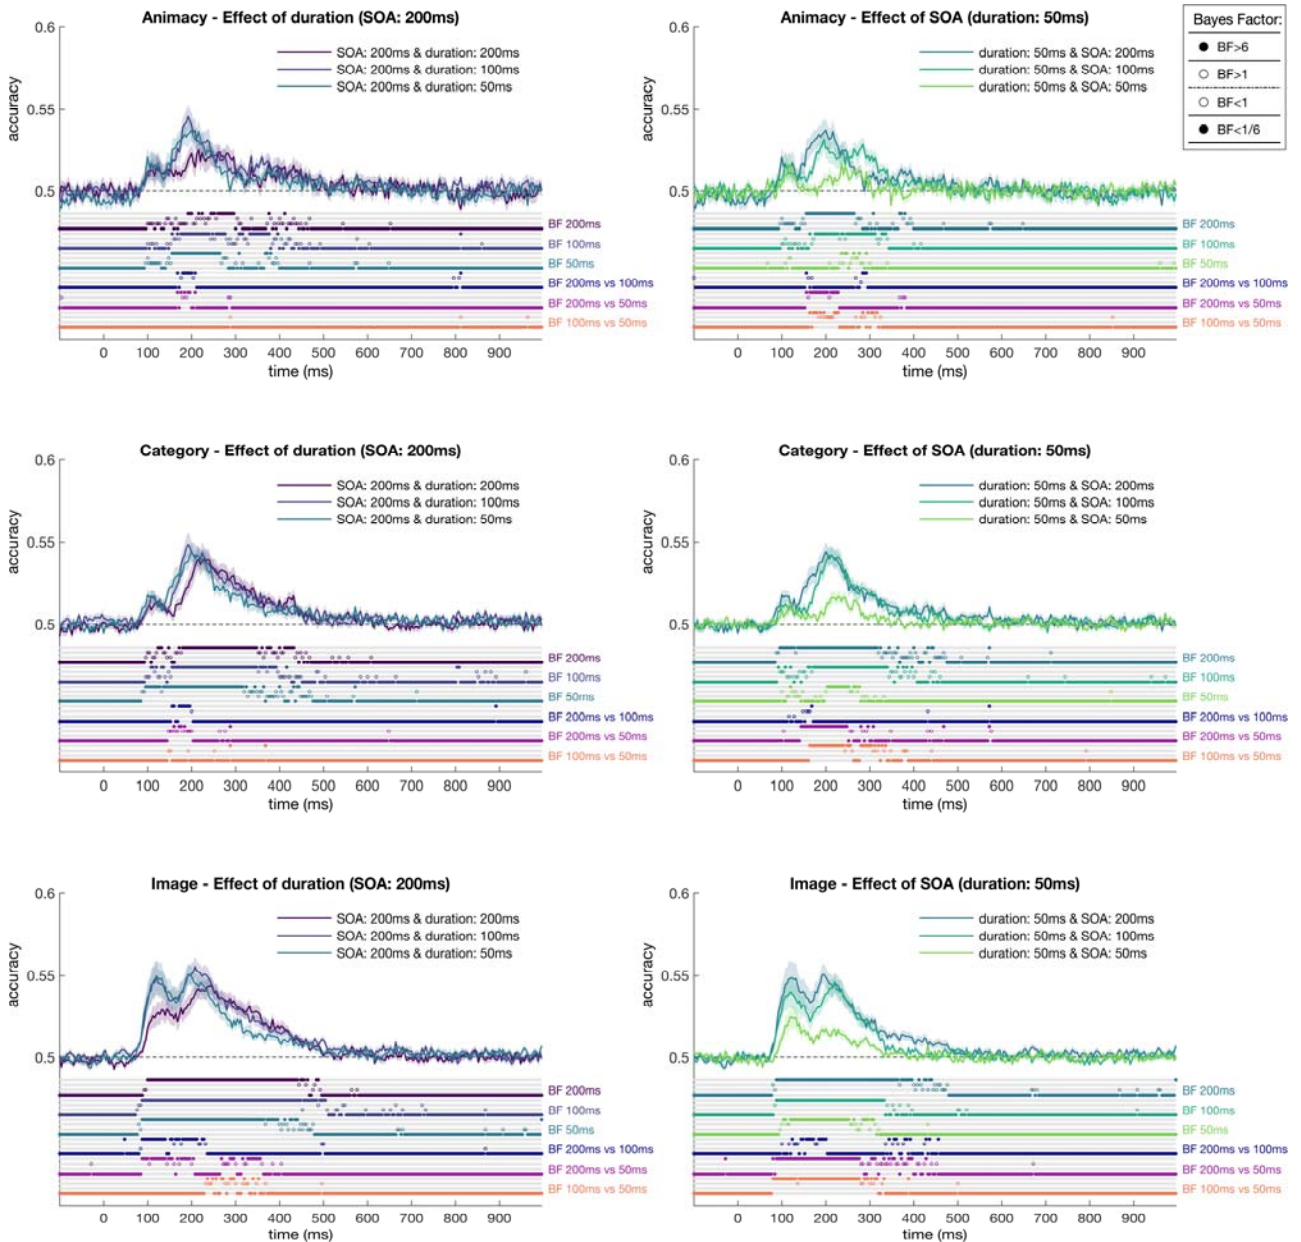

214

215 Figure 2. The effects of duration (left column) and stimulus onset asynchrony (right column) on decoding  
216 accuracy at three categorical levels (animacy, category, and image). Dots above the x-axis show the  
217 thresholded Bayes factors (see inset). The top three rows show the Bayes factors for above-chance  
218 decoding, and the bottom three show Bayes factors for differences between decoding accuracies.

219

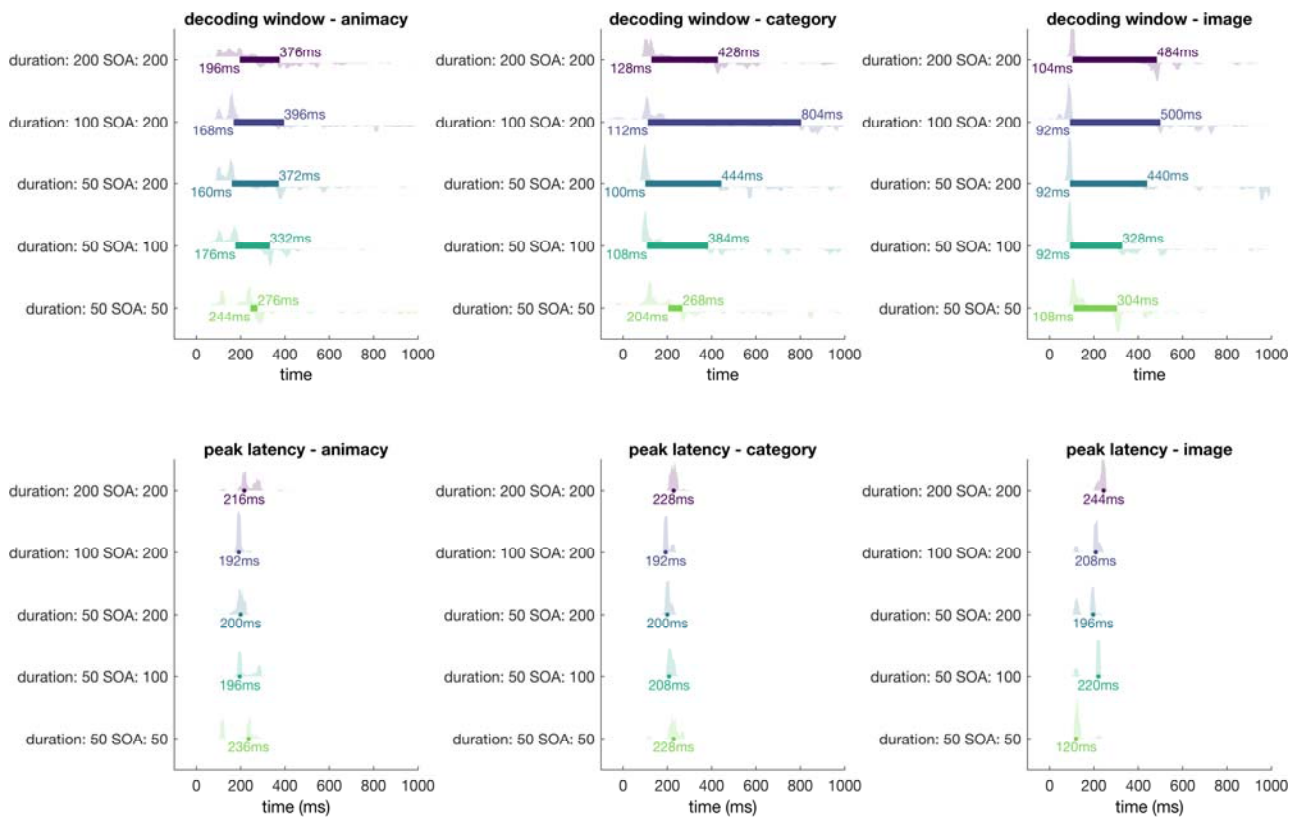

220

221 Figure 3. Onset, offset, and peak latencies for each condition. Onset was defined as the second time  
222 point where the Bayes factor exceeded 6 and offset as the second-to-last time point where the Bayes  
223 factor exceeded 6. Top row: For each condition (y-axis), onset and offset are marked by a filled  
224 horizontal bar and are annotated at their respective time points. Shaded areas show the onset (above  
225 the filled bar) and offset (below the filled bar) latency distributions calculated by bootstrapping  
226 participants with replacement 1000 times and recomputing the statistics. Bottom row: Peak latency  
227 (time point of peak decoding) for each condition. Shaded areas show the peak latency distribution  
228 calculated by bootstrapping participants with replacement 1000 times.

229

## 230 Discussion

231 In this study, we disentangled the effects of duration and stimulus onset asynchrony (SOA) on decoding  
232 performance in rapid visual processing streams. Our results showed that shorter SOAs systematically  
233 reduced the duration of above-chance decoding, as well as the peak decoding accuracy, consistent with  
234 masking at earlier stages of visual processing. In comparison, there were no graded effects of  
235 presentation duration on decoding accuracies. Our results also suggest that presenting stimuli without a  
236 gap (100% duty cycle) leads to delays in visual processing.

237

238 Previous work found that fast presentation rates limits visual processing relative to slower presentation  
239 rates (Grootswagers et al., 2019). It was however unclear whether this difference was due to shorter  
240 stimulus duration or shorter SOA. The results of our study show that stimulus duration and SOA have  
241 separable effects on stimulus processing, with the most pronounced effect being that longer SOAs  
242 enhance decodability of stimuli relative to shorter SOAs. There also appeared to be an effect of duty  
243 cycle, such that neural responses were delayed when images were presented back-to-back (100% duty  
244 cycle). These findings are consistent with recent work that investigated the effect of duration and SOA  
245 on face response amplitudes in a fast periodic visual stimulation paradigm (Retter et al., 2018). Single  
246 unit recordings in temporal cortex of macaques have revealed a similar effect; neural responses to  
247 monkey faces in RSVP are stronger and last longer for slower presentation rates (Keysers, Xiao, Földiák,  
248 & Perrett, 2001, 2005). Interestingly, Keysers et al. (2001) found that the duration of image  
249 discrimination coincided with the SOA length plus 60 ms, an effect attributed to neural competition with  
250 other images in the sequence (Keysers & Perrett, 2002). Although we found that longer SOA led to  
251 longer neural decoding, there was no clear linear relationship between the SOA and length of decoding.  
252 Our decoding results utilise whole brain responses, however, which might be one reason for this  
253 difference. The current results suggest that SOA influences the degree of masking from subsequent  
254 images depending on the stage of processing that is disrupted.

255

256 Our findings suggest that analysing the neural signatures of distractors in RSVP streams can yield insight  
257 into the mechanisms underlying visual masking. Without the need of a separate noise mask, a  
258 substantial number of presentations or conditions can be tested using rapid-MVPA, increasing the  
259 power of such experiments. By shortening the SOA, the masking affected earlier stages of processing,  
260 which has significant potential for studying hierarchical processing systems, such as vision (see also  
261 McKeeff, Remus, & Tong, 2007). For example, future work could apply rapid-MVPA and varying SOAs to

262 stimulus sets that vary on orthogonal features that are expected to occur at different stages in the  
263 processing streams, such as colour and shape.

264

265 Taken together, our results can be used to guide future visual object representation studies that employ  
266 a rapid-MVPA design. Using a 5Hz rate, Grootswagers et al. (2019) obtained 40 epochs for 200 stimuli  
267 (8000 epochs in total) in a 40-minute session. Here, we did not observe strong differences between 5Hz  
268 and 10Hz presentation rates (200ms and 100ms SOA). Thus, a 10Hz 50% duty cycle presentation  
269 paradigm seems to provide a sensitive measure of object decoding accuracy. Notably, this is also a  
270 typical frequency used in RSVP paradigms to study target selection processes, which are postulated to  
271 involve alpha oscillatory activity (Janson, De Vos, Thorne, & Kranczioch, 2014; Zauner et al., 2012). At  
272 10Hz, a 30-minute EEG recording session (excluding breaks) yields 18000 epochs, which has  
273 unprecedented potential for studying a large number of different conditions and/or stimuli. It also  
274 suggests that it is possible to obtain enough epochs for a small number of conditions in a very short (<5-  
275 minute) EEG session. This opens up exciting new possibilities to study special populations for whom long  
276 experiments often pose significant difficulties, such as children and patients.

277

## 278 **Acknowledgements**

279 The authors thank Ayesha Dadamia for assisting with data collection, and Denise Moerel for helpful  
280 comments on a draft of the manuscript. This work was supported by an Australian Research Council  
281 Future Fellowship (FT120100816) and an Australian Research Council Discovery project (DP160101300)  
282 awarded to T.A.C. The authors acknowledge the University of Sydney HPC service for providing High  
283 Performance Computing resources. The authors declare no competing financial interests.

284

## 285 **References**

286

- 287 Bachmann, T., & Allik, J. (1976). Integration and Interruption in the Masking of Form by Form.  
288 *Perception, 5*(1), 79–97. <https://doi.org/10.1068/p050079>
- 289 Brainard, D. H. (1997). The psychophysics toolbox. *Spatial Vision, 10*, 433–436.
- 290 Broadbent, D. E., & Broadbent, M. H. (1987). From detection to identification: Response to multiple  
291 targets in rapid serial visual presentation. *Perception & Psychophysics, 42*(2), 105–113.
- 292 Collins, E., Robinson, A. K., & Behrmann, M. (2018). Distinct neural processes for the perception of  
293 familiar versus unfamiliar faces along the visual hierarchy revealed by EEG. *NeuroImage, 181*,  
294 120–131. <https://doi.org/10.1016/j.neuroimage.2018.06.080>
- 295 Delorme, A., & Makeig, S. (2004). EEGLAB: an open source toolbox for analysis of single-trial EEG  
296 dynamics including independent component analysis. *Journal of Neuroscience Methods, 134*(1),  
297 9–21. <https://doi.org/10.1016/j.jneumeth.2003.10.009>
- 298 Dienes, Z. (2011). Bayesian Versus Orthodox Statistics: Which Side Are You On? *Perspectives on*  
299 *Psychological Science, 6*(3), 274–290. <https://doi.org/10.1177/1745691611406920>
- 300 Fahrenfort, J. J., Scholte, H. S., & Lamme, V. A. (2007). Masking disrupts reentrant processing in human  
301 visual cortex. *Journal of Cognitive Neuroscience, 19*(9), 1488–1497.
- 302 Giesbrecht, B., & Di Lollo, V. (1998). Beyond the attentional blink: visual masking by object substitution.  
303 *Journal of Experimental Psychology: Human Perception and Performance, 24*(5), 1454.
- 304 Grootswagers, T., Robinson, A. K., & Carlson, T. A. (2019). The representational dynamics of visual  
305 objects in rapid serial visual processing streams. *NeuroImage, 188*, 668–679.  
306 <https://doi.org/10.1016/j.neuroimage.2018.12.046>
- 307 Grootswagers, T., Wardle, S. G., & Carlson, T. A. (2017). Decoding Dynamic Brain Patterns from Evoked  
308 Responses: A Tutorial on Multivariate Pattern Analysis Applied to Time Series Neuroimaging  
309 Data. *Journal of Cognitive Neuroscience, 29*(4), 677–697. [https://doi.org/10.1162/jocn\\_a\\_01068](https://doi.org/10.1162/jocn_a_01068)

- 310 Janson, J., De Vos, M., Thorne, J. D., & Kranczioch, C. (2014). Endogenous and Rapid Serial Visual  
311 Presentation-induced Alpha Band Oscillations in the Attentional Blink. *Journal of Cognitive*  
312 *Neuroscience*, 26(7), 1454–1468. [https://doi.org/10.1162/jocn\\_a\\_00551](https://doi.org/10.1162/jocn_a_00551)
- 313 Jeffreys, H. (1961). *Theory of probability*. Oxford University Press.
- 314 Kanwisher, N. G. (1987). Repetition blindness: Type recognition without token individuation. *Cognition*,  
315 27(2), 117–143.
- 316 Kass, R. E., & Raftery, A. E. (1995). Bayes factors. *Journal of the American Statistical Association*, 90(430),  
317 773–795.
- 318 Keyers, C., & Perrett, D. I. (2002). Visual masking and RSVP reveal neural competition. *Trends in*  
319 *Cognitive Sciences*, 6(3), 120–125. [https://doi.org/10.1016/S1364-6613\(00\)01852-0](https://doi.org/10.1016/S1364-6613(00)01852-0)
- 320 Keyers, C., Xiao, D.-K., Földiák, P., & Perrett, D. I. (2001). The Speed of Sight. *Journal of Cognitive*  
321 *Neuroscience*, 13(1), 90–101. <https://doi.org/10.1162/089892901564199>
- 322 Keyers, C., Xiao, D.-K., Földiák, P., & Perrett, D. I. (2005). Out of sight but not out of mind: the  
323 neurophysiology of iconic memory in the superior temporal sulcus. *Cognitive Neuropsychology*,  
324 22(3–4), 316–332. <https://doi.org/10.1080/02643290442000103>
- 325 Kleiner, M., Brainard, D., Pelli, D., Ingling, A., Murray, R., Broussard, C., & others. (2007). What's new in  
326 Psychtoolbox-3. *Perception*, 36(14), 1.
- 327 Mack, M. L., Gauthier, I., Sadr, J., & Palmeri, T. J. (2008). Object detection and basic-level categorization:  
328 Sometimes you know it is there before you know what it is. *Psychonomic Bulletin & Review*,  
329 15(1), 28–35. <https://doi.org/10.3758/PBR.15.1.28>
- 330 Mack, M. L., & Palmeri, T. J. (2011). The Timing of Visual Object Categorization. *Frontiers in Psychology*,  
331 2. <https://doi.org/10.3389/fpsyg.2011.00165>
- 332 Marti, S., & Dehaene, S. (2017). Discrete and continuous mechanisms of temporal selection in rapid  
333 visual streams. *Nature Communications*, 8(1), 1955. <https://doi.org/10.1038/s41467-017-02079->  
334 x



- 335 McKeeff, T. J., Remus, D. A., & Tong, F. (2007). Temporal Limitations in Object Processing Across the  
336 Human Ventral Visual Pathway. *Journal of Neurophysiology*, *98*(1), 382–393.  
337 <https://doi.org/10.1152/jn.00568.2006>
- 338 Mohsenzadeh, Y., Qin, S., Cichy, R. M., & Pantazis, D. (2018). Ultra-Rapid serial visual presentation  
339 reveals dynamics of feedforward and feedback processes in the ventral visual pathway. *ELife*, *7*,  
340 e36329. <https://doi.org/10.7554/eLife.36329>
- 341 Oostenveld, R., & Praamstra, P. (2001). The five percent electrode system for high-resolution EEG and  
342 ERP measurements. *Clinical Neurophysiology*, *112*(4), 713–719. [https://doi.org/10.1016/S1388-](https://doi.org/10.1016/S1388-2457(00)00527-7)  
343 [2457\(00\)00527-7](https://doi.org/10.1016/S1388-2457(00)00527-7)
- 344 Oosterhof, N. N., Connolly, A. C., & Haxby, J. V. (2016). CoSMoMMPA: Multi-Modal Multivariate Pattern  
345 Analysis of Neuroimaging Data in Matlab/GNU Octave. *Frontiers in Neuroinformatics*, *10*.  
346 <https://doi.org/10.3389/fninf.2016.00027>
- 347 Pelli, D. G. (1997). The VideoToolbox software for visual psychophysics: Transforming numbers into  
348 movies. *Spatial Vision*, *10*(4), 437–442.
- 349 Potter, M. C., Wyble, B., Haggmann, C. E., & McCourt, E. S. (2014). Detecting meaning in RSVP at 13 ms  
350 per picture. *Attention, Perception, & Psychophysics*, *76*(2), 270–279.
- 351 Raymond, J. E., Shapiro, K. L., & Arnell, K. M. (1992). Temporary suppression of visual processing in an  
352 RSVP task: An attentional blink? *Journal of Experimental Psychology: Human Perception and*  
353 *Performance*, *18*(3), 849.
- 354 Retter, T. L., Jiang, F., Webster, M. A., & Rossion, B. (2018). Dissociable effects of inter-stimulus interval  
355 and presentation duration on rapid face categorization. *Vision Research*, *145*, 11–20.  
356 <https://doi.org/10.1016/j.visres.2018.02.009>
- 357 Rouder, J. N., Speckman, P. L., Sun, D., Morey, R. D., & Iverson, G. (2009). Bayesian t tests for accepting  
358 and rejecting the null hypothesis. *Psychonomic Bulletin & Review*, *16*(2), 225–237.

- 359 Seiffert, A. E., & Di Lollo, V. (1997). Low-level masking in the attentional blink. *Journal of Experimental*  
360 *Psychology: Human Perception and Performance*, 23(4), 1061.
- 361 Sergent, C., Baillet, S., & Dehaene, S. (2005). Timing of the brain events underlying access to  
362 consciousness during the attentional blink. *Nature Neuroscience*, 8(10), 1391.
- 363 Thorpe, S., Fize, D., & Marlot, C. (1996). Speed of processing in the human visual system. *Nature*,  
364 381(6582), 520–522. <https://doi.org/doi:10.1038/381520a0>
- 365 VanRullen, R., & Thorpe, S. J. (2001). The Time Course of Visual Processing: From Early Perception to  
366 Decision-Making. *Journal of Cognitive Neuroscience*, 13(4), 454–461.  
367 <https://doi.org/10.1162/08989290152001880>
- 368 Wagenmakers, E.-J. (2007). A practical solution to the pervasive problems of p values. *Psychonomic*  
369 *Bulletin & Review*, 14(5), 779–804. <https://doi.org/10.3758/BF03194105>
- 370 Wetzels, R., Matzke, D., Lee, M. D., Rouder, J. N., Iverson, G. J., & Wagenmakers, E.-J. (2011). Statistical  
371 Evidence in Experimental Psychology: An Empirical Comparison Using 855 t Tests. *Perspectives*  
372 *on Psychological Science*, 6(3), 291–298. <https://doi.org/10.1177/1745691611406923>
- 373 Zauner, A., Fellinger, R., Gross, J., Hanslmayr, S., Shapiro, K., Gruber, W., ... Klimesch, W. (2012). Alpha  
374 entrainment is responsible for the attentional blink phenomenon. *NeuroImage*, 63(2), 674–686.  
375 <https://doi.org/10.1016/j.neuroimage.2012.06.075>  
376
